# Supplementary material
Source: PubMed Central journal article supplement (PMC3553788)
Supplement: AEM.01924-12_zam999104006so1.pdf [file AEM.01924-12_zam999104006so1.pdf]

## Supplemental Data

SUPPLEMENTAL TABLE 1. Description of physical and chemical attributes measured from sampled water, and meteorological, hydrological, temporal, and land use variables. These variables were used as independent criteria in classification and regression tree analyses.

| Variable Name    | Variable Description (unit)                                                                                                                                                     |
|------------------|---------------------------------------------------------------------------------------------------------------------------------------------------------------------------------|
| SEASON           | The season (spring, summer, fall or winter) in which the sample was collected                                                                                                   |
| SHREVE*          | The size of the sampled watercourse at the sample site following Shreve (1966)                                                                                                  |
| STRAHLER**       | The size of the sampled watercourse at the sample site following Strahler (1952)                                                                                                |
| AMIA_AMN         | NH <sub>3</sub> (ammonia) + NH <sub>4</sub> (ammonium) concentration in sample water (mg L <sup>-1</sup> )                                                                      |
| NITRITE          | NO <sub>2</sub> <sup>-</sup> (nitrite) concn in sample water (mg L <sup>-1</sup> )                                                                                              |
| NITRATE          | NO <sub>3</sub> <sup>-</sup> (nitrate) concn in sample water (mg L <sup>-1</sup> )                                                                                              |
| REA_PHOS         | Dissolved reactive phosphorus concn in sample water (mg L <sup>-1</sup> )                                                                                                       |
| TOTKN            | Total Kjeldahl nitrogen (TKN) concn in sample water (mg L <sup>-1</sup> )                                                                                                       |
| TOTPHO           | Total phosphorus concn in sample water (mg L <sup>-1</sup> )                                                                                                                    |
| TEMP             | Temperature of sample water (°C)                                                                                                                                                |
| pH               | pH of sample water                                                                                                                                                              |
| CONDUCTIVITY     | Electrical conductivity of sample water (mS cm <sup>-1</sup> )                                                                                                                  |
| DISS_ OXYGEN _P, | Gaseous O <sub>2</sub> dissolved in sample water (% saturation and mg L <sup>-1</sup> )                                                                                         |
| DISS_ OXYGEN     |                                                                                                                                                                                 |
| _MGL             |                                                                                                                                                                                 |
| ORP              | Oxidation reduction potential of sample water (mV)                                                                                                                              |
| TURBIDITY        | Cloudiness of sample water as measured with a nephelometer sensor (NTU; nephelometric turbidity units)                                                                          |
| DIS_PAY          | Mean daily river discharge at Payne (Shreve order = 3243) hydrometric station (m <sup>3</sup> s <sup>-1</sup> )                                                                 |
| RUS_TOTALRAIN,   | Total Russell meteorology (met.) rainfall for day of sampling; total Russell met. rainfall for day of sampling and x = 1, 2, 3 and 7 days in advance of sampling day (mm)       |
| RUS_TOTALRAINxD  |                                                                                                                                                                                 |
| RUS_MAXTEMP,     | Daily maximum, minimum and mean air temperature at Russell met. station (°C)                                                                                                    |
| RUS_MINTEMP,     |                                                                                                                                                                                 |
| RUS_MEANTEMP     |                                                                                                                                                                                 |
| BASIN_(land use) | Proportion of land use (determined via RS) in total sample site catchment area: Cropland, developed, forage, pasture, shrubland, and forest (km <sup>2</sup> km <sup>-2</sup> ) |
| CROPP_yK         | Proportion of cropland, identified via RS, in catchment areas upstream of site with MUFL of 2, 5, and 10 km (km <sup>2</sup> km <sup>-2</sup> )                                 |
| DEVELP_yK        | Proportion of developed land, identified via RS, in catchment areas upstream of site with MUFL of 2, 5, and 10 km (km <sup>2</sup> km <sup>-2</sup> )                           |
| FORAGEP_yK       | Proportion of forage land, identified via RS, in catchment areas upstream of site with MUFL of 2, 5, and 10 km (km <sup>2</sup> km <sup>-2</sup> )                              |

|                |                                                                                                                                                                                                                                                                                                                                                                                                 |
|----------------|-------------------------------------------------------------------------------------------------------------------------------------------------------------------------------------------------------------------------------------------------------------------------------------------------------------------------------------------------------------------------------------------------|
| PASTP_yK       | Proportion of pasture land, identified via RS, in catchment areas upstream of site with MUFL of 2, 5, and 10 km ( $\text{km}^2 \text{km}^{-2}$ )                                                                                                                                                                                                                                                |
| SHRUBP_yK      | Proportion of shrubland, identified via RS, in catchment areas upstream of site with MUFL of 2, 5, and 10 km ( $\text{km}^2 \text{km}^{-2}$ )                                                                                                                                                                                                                                                   |
| VEGP_yK        | Proportion of forest, identified via RS, in catchment areas upstream of site with MUFL of 2, 5, and 10 km ( $\text{km}^2 \text{km}^{-2}$ )                                                                                                                                                                                                                                                      |
| NUD_(land use) | Upstream distance from sample location to nearest land use observations identified by R-SS of type barn (BARN), developed high (DEVHI), developed low (DEVLO), forest (FOREST), pasture (PASTURE), dairy operation (DAIRY_OP), cattle or dairy barn (CAT_DAI_BA), pasture with no restriction to water course (PAST_ACC), horse barn (HORSEBA), hog barn (HOGBA) and poultry barn (POULBA) (km) |
| DBARN_yK       | Density of barns, identified via R-SS, in catchment areas upstream of site with MUFL of 2, 5, and 10 km (obs. $\text{km}^{-2}$ )                                                                                                                                                                                                                                                                |
| DDEVHI_yK      | Density of developed high, identified via R-SS, in catchment areas upstream of site with MUFL of 2, 5, and 10 km (obs. $\text{km}^{-2}$ )                                                                                                                                                                                                                                                       |
| DDEVLO_yK      | Density of developed low, identified via R-SS, in catchment areas upstream of site with MUFL of 2, 5, and 10 km (obs. $\text{km}^{-2}$ )                                                                                                                                                                                                                                                        |
| DFORE_yK       | Density of forest, identified via R-SS, in catchment areas upstream of site with MUFL of 2, 5, and 10 km (obs. $\text{km}^{-2}$ )                                                                                                                                                                                                                                                               |
| DPAST_yK       | Density of pasture, identified via R-SS, in catchment areas upstream of site with MUFL of 2, 5, and 10 km (obs. $\text{km}^{-2}$ )                                                                                                                                                                                                                                                              |
| DDAIRYOP_yK    | Density of dairy operations, identified via R-SS, in catchment areas upstream of site with MUFL of 2, 5, and 10 km (obs. $\text{km}^{-2}$ )                                                                                                                                                                                                                                                     |
| DCAT_OR_DA_yK  | Density of cattle or dairy operations, identified via R-SS, in catchment areas upstream of site with MUFL of 2, 5, and 10 km (obs. $\text{km}^{-2}$ )                                                                                                                                                                                                                                           |
| DPAST_ACC_yK   | Density of pasture with no watercourse restrictions, identified via R-SS, in catchment areas upstream of site with MUFL of 2, 5, and 10 km (obs. $\text{km}^{-2}$ )                                                                                                                                                                                                                             |

---

x = number of days in advance of sample; y = maximum upstream flow length (MUFL) from the

sample site at which sample site catchment was defined; K = km; obs., number of observations; RS (remote sensing); R-SS (road-side survey).

\* **Shreve R. L. 1966.** Statistical law of stream numbers. *J. Geol.* **74**:17–37.

\*\***Strahler A.N. 1952.** Dynamic basis of geomorphology. *Geol. Soc. Am. Bull.* **63**:923–938.
